# Supplementary material for: Multi-drug Resistant Extended-Spectrum Beta-Lactamase (ESBL)-Producing Escherichia coli in a Dairy Herd: Distribution and Antimicrobial Resistance Profiles
Source: Preprints.org preprint supplement (doi:10.20944/preprints202402.0156.v1), 2024-02-02
Supplement: Supplementary file 1 [file Supplementary Table S2_Penati et al.docx]

**Supplementary Table S2.** MIC values expressed in µg/mL for the ESBL *E. coli* isolates assessed with the plate assay.

| **Isolate** | **Aminosidine** | **Amoxicillin/Clavulanic Acid** | **Ampicillin** | **Cefazolin** | **Cefotaxime** | **Colistin** | **Enrofloxacin** | **Florfenicol** | **Flumequine** | **Gentamicin** | **Kanamycin** | **Sulfisoxazole** | **Tetracyclin** | **Trimethoprim/Sulfametoxazole** |
| --- | --- | --- | --- | --- | --- | --- | --- | --- | --- | --- | --- | --- | --- | --- |
| M1 | > 32 | = 8 | > 32 | > 8 | > 4 | = 0.25 | = 0.5 | = 8 | = 16 | > 32 | > 32 | > 512 | > 16 | = 0.125 |
| M4 | > 32 | = 8 | > 32 | > 8 | > 4 | = 0.25 | = 0.031 | > 64 | <= 1 | = 1 | > 32 | > 512 | > 16 | > 16 |
| M5 | > 32 | = 8 | > 32 | > 8 | > 4 | = 0.25 | <= 0.016 | = 8 | <= 1 | = 2 | > 32 | > 512 | > 16 | = 0.125 |
| M8 | > 32 | = 8 | > 32 | > 8 | > 4 | = 0.25 | = 0.031 | = 8 | <= 1 | = 1 | > 32 | > 512 | > 16 | = 0.125 |
| M9 | > 32 | = 8 | > 32 | > 8 | > 4 | = 0.25 | = 0.063 | = 8 | <= 1 | = 0.5 | > 32 | > 512 | > 16 | = 0.25 |
| M12 | > 32 | = 8 | > 32 | > 8 | > 4 | = 0.5 | = 0.031 | > 64 | <= 1 | = 1 | > 32 | > 512 | > 16 | > 16 |
| M13 | > 32 | = 16 | > 32 | > 8 | > 4 | = 0.5 | = 0.031 | > 64 | <= 1 | = 1 | > 32 | > 512 | > 16 | > 16 |
| M14 | > 32 | = 8 | > 32 | > 8 | > 4 | = 0.25 | = 0.031 | = 8 | <= 1 | = 2 | > 32 | > 512 | > 16 | = 0.25 |
| M15 | > 32 | = 8 | > 32 | > 8 | > 4 | = 0.25 | = 32 | = 4 | > 16 | = 0.5 | > 32 | > 512 | > 16 | > 16 |
| M16 | > 32 | = 8 | > 32 | > 8 | > 4 | = 0.25 | = 0.25 | = 4 | = 8 | = 1 | > 32 | <= 128 | > 16 | <= 0.063 |
| M17 | > 32 | = 8 | > 32 | > 8 | > 4 | = 0.25 | = 0.063 | > 64 | <= 1 | > 32 | > 32 | > 512 | > 16 | = 0.25 |
| M18 | > 32 | = 32 | > 32 | > 8 | > 4 | = 0.5 | = 32 | > 64 | > 16 | > 32 | > 32 | > 512 | > 16 | > 16 |
| M19 | > 32 | = 8 | > 32 | > 8 | > 4 | = 0.25 | = 0.031 | = 16 | <= 1 | = 1 | > 32 | > 512 | > 16 | = 0.25 |
| F1 | > 32 | = 8 | > 32 | > 8 | > 4 | = 0.5 | = 0.063 | > 64 | <= 1 | = 1 | > 32 | > 512 | > 16 | > 16 |
| F2 | > 32 | = 8 | > 32 | > 8 | > 4 | = 0.5 | = 0.031 | > 64 | <= 1 | = 1 | > 32 | > 512 | > 16 | > 16 |
| F3 | > 32 | = 8 | > 32 | > 8 | > 4 | = 0.5 | = 0.031 | > 64 | <= 1 | = 1 | > 32 | > 512 | > 16 | > 16 |
| F6 | > 32 | = 8 | > 32 | > 8 | > 4 | = 0.5 | = 32 | = 8 | > 16 | = 1 | > 32 | > 512 | = 2 | > 16 |
| F8 | > 32 | = 8 | > 32 | > 8 | > 4 | = 0.25 | = 0.031 | > 64 | <= 1 | = 1 | > 32 | > 512 | > 16 | > 16 |
| F9 | > 32 | = 8 | > 32 | > 8 | > 4 | = 0.25 | = 0.031 | = 8 | <= 1 | = 0.5 | > 32 | > 512 | > 16 | = 0.125 |
| F10 | > 32 | = 8 | > 32 | > 8 | > 4 | = 0.25 | <= 0.016 | = 8 | <= 1 | = 0.5 | > 32 | > 512 | > 16 | = 0.5 |
| F11 | > 32 | = 8 | > 32 | > 8 | > 4 | = 0.5 | = 0.031 | > 64 | <= 1 | = 2 | > 32 | > 512 | > 16 | > 16 |
| F12 | > 32 | = 8 | > 32 | > 8 | > 4 | = 0.5 | = 0.031 | = 16 | <= 1 | = 2 | > 32 | > 512 | > 16 | = 0.25 |
| F13 | > 32 | = 16 | > 32 | > 8 | > 4 | = 0.25 | = 0.031 | = 16 | <= 1 | = 1 | > 32 | > 512 | > 16 | = 0.125 |
| F14 | > 32 | = 8 | > 32 | > 8 | > 4 | = 0.5 | = 32 | = 8 | > 16 | = 0.5 | > 32 | > 512 | = 2 | > 16 |
| F15 | > 32 | = 8 | > 32 | > 8 | > 4 | = 0.25 | = 0.5 | = 8 | = 16 | = 32 | > 32 | > 512 | = 2 | > 16 |
| F16 | > 32 | = 8 | > 32 | > 8 | > 4 | = 0.25 | <= 0.016 | = 16 | <= 1 | = 1 | > 32 | > 512 | > 16 | = 0.5 |
| F17 | > 32 | = 8 | > 32 | > 8 | > 4 | = 0.25 | <= 0.016 | = 8 | <= 1 | = 0.5 | > 32 | > 512 | > 16 | = 0.25 |
| F18 | > 32 | = 8 | > 32 | > 8 | > 4 | = 0.5 | = 0.125 | > 64 | <= 1 | = 1 | > 32 | > 512 | > 16 | > 16 |
| Male pens | > 32 | = 8 | > 32 | > 8 | > 4 | = 0.5 | = 1 | > 64 | = 2 | > 32 | > 32 | > 512 | > 16 | > 16 |
| Female pens | > 32 | = 8 | > 32 | > 8 | > 4 | = 0.5 | > 32 | = 8 | > 16 | = 1 | > 32 | > 512 | = 2 | > 16 |
| Treated cow 1 | > 32 | = 8 | > 32 | > 8 | > 4 | = 0.5 | = 0.5 | = 8 | = 8 | = 1 | > 32 | <= 128 | > 16 | <= 0.063 |
| Treated cow 2 | > 32 | = 8 | > 32 | > 8 | > 4 | = 0.5 | = 1 | = 8 | = 4 | = 0.5 | > 32 | <= 128 | > 16 | <= 0.063 |
| Waste milk | > 32 | = 16 | > 32 | > 8 | > 4 | = 0.25 | = 0.031 | = 8 | <= 1 | = 0.5 | > 32 | > 512 | > 16 | = 0.125 |
| Cow feeding rack | > 32 | = 8 | > 32 | > 8 | > 4 | = 0.25 | = 0.5 | > 64 | = 2 | > 32 | > 32 | > 512 | > 16 | > 16 |
| Cow alley floor | > 32 | = 8 | > 32 | > 8 | > 4 | = 0.25 | = 0.031 | = 8 | <= 1 | = 0.5 | > 32 | <= 128 | > 16 | <= 0.063 |
| Fresh cow alley floor | > 32 | = 8 | > 32 | > 8 | > 4 | = 0.25 | = 1 | = 8 | = 4 | = 1 | > 32 | <= 128 | > 16 | = 0.5 |
| Primiparous cow alley floor | > 32 | = 8 | > 32 | > 8 | > 4 | = 0.5 | = 0.5 | = 4 | = 8 | = 0.5 | > 32 | <= 128 | > 16 | <= 0.063 |
| Calf feeding bucket | > 32 | = 8 | > 32 | > 8 | > 4 | = 0.5 | = 0.5 | > 64 | = 4 | = 2 | > 32 | > 512 | > 16 | > 16 |
| Calf drinking water | = 4 | = 16 | > 32 | > 8 | > 4 | = 0.25 | = 0.5 | = 8 | = 2 | = 1 | = 4 | > 512 | > 16 | > 16 |
