# Supplementary material for: Multi-drug Resistant Extended-Spectrum Beta-Lactamase (ESBL)-Producing Escherichia coli in a Dairy Herd: Distribution and Antimicrobial Resistance Profiles
Source: Preprints.org preprint supplement (doi:10.20944/preprints202402.0156.v1), 2024-02-02
Supplement: Supplementary file 2 [file supplementary]

Archive with 2 entries (2 files):
- Supplementary File S1_Penati et al.pdf
- Supplementary Table S2_Penati et al.docx
